# Supplementary material
Source: Springer Nature journal article supplement (https://www.springermedizin.de/resource/supplementary/12967_2008_291_MOESM7_ESM.pdf/9576124)

**Pre-vaccine**

**Post-vaccine**

**Study  
completion**

**Follow up**

**Negative**

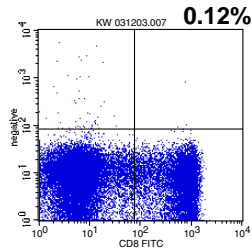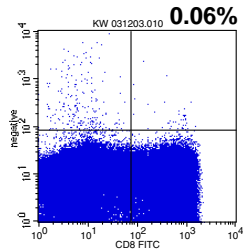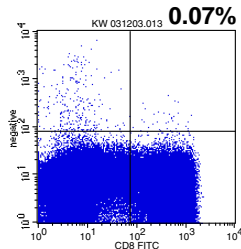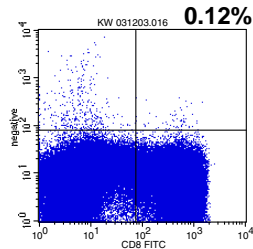

**MART-1**

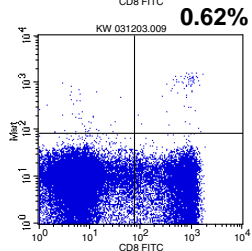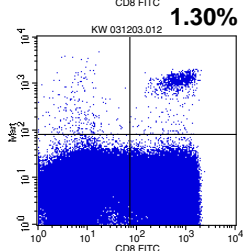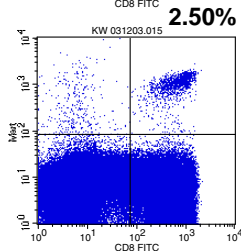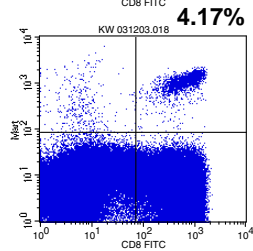

**CD8 FITC**

Supplement: MOESM7 [file 9576124]
